# Supplementary material for: Linkage disequilibrium, SNP frequency change due to selection, and association mapping in popcorn chromosome regions containing QTLs for quality traits
Source: PubMed Central journal article supplement (PMC4807383; doi:10.1590/1678-4685-gmb-2015-0126), 2016
Supplement: 1415-4757-gmb-39-1-97-Suppl01.pdf [file 1415-4757-gmb-39-1-97-Suppl01.pdf]

**Table S1** - Information on SNPs showing significant association at a false discovery rate of 10% with expansion volume, 100-kernel weight, or kernel density, and on candidate genes.

| SNP                             | Chr. | Position (pb)           | Candidate gene | Position (pb)       | Gene product and ontology                                                                                                                                                               | Expression                                                                                                                                        |
|---------------------------------|------|-------------------------|----------------|---------------------|-----------------------------------------------------------------------------------------------------------------------------------------------------------------------------------------|---------------------------------------------------------------------------------------------------------------------------------------------------|
| SYN6001                         | 1    | 2208377                 | GRMZM2G109725  | 2205748-2210356     | Uncharacterized protein (protein catabolic process)                                                                                                                                     | High level in the seed (endosperm), during mid stage of fruit ripening (R3 to R4)                                                                 |
| SYN11901                        | 1    | 8510819                 | GRMZM2G009014  | 8510046-8514842     | Uncharacterized protein                                                                                                                                                                 | Intermediate level in the whole seed (embryo, endosperm (high level in R3), and pericarp), during early to mid stage of fruit ripening (R1 to R4) |
| PZE-101131103/<br>PZE-101131166 | 1    | 168256682/<br>168429768 | GRMZM2G018472  | 168430589-168435266 | Uncharacterized protein (protein dimerization activity)                                                                                                                                 | Intermediate to high level in the whole seed, during early to mid stage of fruit ripening                                                         |
| SYN33443                        | 3    | 15222626                | GRMZM2G334628  | 15220879-15230827   | Cell number regulator 8 (carbohydrate metabolic process) (glucose catabolic process)                                                                                                    | Intermediate to high level in the whole seed, during early to mid stage of fruit ripening                                                         |
| PZE-104033459                   | 4    | 41873008                | GRMZM2G138060  | 41396390-41405179   | Sugary1 (carbohydrate metabolic process) (maltose metabolic process) (starch biosynthetic process)                                                                                      | High level in the seed (endosperm), during early to mid stage of fruit ripening                                                                   |
| SYN4651                         | 6    | 147905068               | GRMZM2G070075  | 147904224-147915023 | Uncharacterized protein                                                                                                                                                                 | Intermediate level in the whole seed, during early to mid stage of fruit ripening                                                                 |
|                                 |      |                         | GRMZM2G058472  | 148164946-148170153 | Secondary cell wall glycosyltransferase family 8 isoform 1; Secondary cell wall glycosyltransferase family 8 isoform 2 (starch metabolic process) (glucuronoxylan biosynthetic process) | Intermediate level in the pericarp, during mid stage of fruit ripening (R3)                                                                       |
|                                 |      |                         | GRMZM2G121514  | 147413665-147418505 | Beta-N-acetylhexosaminidase (carbohydrate metabolic process)                                                                                                                            | Intermediate to high level in the embryo, during mid stage of fruit ripening                                                                      |
| PZE-107083429                   | 7    | 125723685               | GRMZM2G133613  | 124733971-124736951 | N-acetyllactosaminide 3-alpha-galactosyltransferase (carbohydrate metabolic process) (protein glycosylation)                                                                            | Intermediate to low level in the endosperm, during mid stage of fruit ripening                                                                    |
| PZE-108134983/<br>SYN20806      | 8    | 173931575/<br>173973257 | GRMZM2G087117  | 173953988-173958520 | Uncharacterized protein                                                                                                                                                                 | Intermediate to high level in the whole seed, during early to mid stage of fruit ripening                                                         |
|                                 |      |                         | GRMZM2G002786  | 174954713-174956656 | Seed maturation protein; uncharacterized protein                                                                                                                                        | High level in the seed, during early stage of fruit ripening (R1); high level in the pericarp, during fruit formation (R3)                        |
|                                 |      |                         | GRMZM2G118462  | 173973120-173978270 | Trehalose phosphatase/synthase family protein; uncharacterized protein (carbohydrate metabolic process)                                                                                 | Intermediate level in the whole seed, during early to mid stage of fruit ripening                                                                 |
|                                 |      |                         | GRMZM2G149093  | 173845613-173848278 | Uncharacterized protein (lipid metabolic process) (triglyceride lipase activity) (hydrolase activity)                                                                                   | Intermediate to high level in the embryo, during early to mid stage of fruit ripening                                                             |

|               |    |           |               |                     |                                                                                                                                                              |                                                                                       |
|---------------|----|-----------|---------------|---------------------|--------------------------------------------------------------------------------------------------------------------------------------------------------------|---------------------------------------------------------------------------------------|
| PZE-110012671 | 10 | 11184622  | GRMZM2G392513 | 11408729-11421794   | Inositol-3-phosphate synthase (carbohydrate metabolic process) (inositol biosynthetic process) (lipid metabolic process) (phospholipid biosynthetic process) | High level in the embryo, during early to mid stage of fruit ripening                 |
| PZE-110060686 | 10 | 114892724 | GRMZM2G049681 | 114873031-114876662 | Putative uncharacterized protein (protein metabolic process)                                                                                                 | Intermediate to high level in the embryo, during early to mid stage of fruit ripening |
