# Supplementary material for: Linkage disequilibrium, SNP frequency change due to selection, and association mapping in popcorn chromosome regions containing QTLs for quality traits
Source: PubMed Central journal article supplement (PMC4807383; doi:10.1590/1678-4685-gmb-2015-0126), 2016
Supplement: 1415-4757-gmb-39-1-97-Suppl02.pdf [file 1415-4757-gmb-39-1-97-Suppl02.pdf]

**Table S2** - Information on SNPs with significant allele frequency change at 0.05% and candidate genes.

| SNP                                     | Chr. | Position (pb)                      | Candidate gene | Position (pb)     | Gene product and ontology                                                                                                       | Expression                                                                                                                             |
|-----------------------------------------|------|------------------------------------|----------------|-------------------|---------------------------------------------------------------------------------------------------------------------------------|----------------------------------------------------------------------------------------------------------------------------------------|
| SYN6001                                 | 1    | 2208377                            | GRMZM2G109725  | 2205748-2210356   | Uncharacterized protein (protein catabolic process)                                                                             | High level in the seed (endosperm), during mid stage of fruit ripening (R3 to R4)                                                      |
| SYN27251/<br>PUT-163a-5499487-2275      | 1    | 2432669/<br>2536526                | GRMZM2G052546  | 2535973-2542554   | RIP1; uncharacterized protein (carbohydrate metabolic process) (maltose metabolic process) (starch metabolic/catabolic process) | Low level in the whole seed (embryo, endosperm, and pericarp), during early to mid stage of fruit ripening (R1 to R4)                  |
| SYN38927                                | 1    | 2691547                            | GRMZM2G035377  | 2655521-2658069   | Uncharacterized protein (carbohydrate metabolic process) (glucuronoxylan biosynthetic process)                                  | Non information available                                                                                                              |
|                                         |      |                                    | GRMZM2G388684  | 2690772-2692141   | Xyloglucan:xyloglucosyl transferase (carbohydrate metabolic process) (glucan metabolic process)                                 | Low level in the whole seed, during early to mid stage of fruit ripening                                                               |
|                                         |      |                                    | GRMZM2G085827  | 2725603-2734211   | Holo-[acyl-carrier-protein] synthase (lipid metabolic process) (fatty acid biosynthetic process)                                | High level in the embryo and intermediate level in the seed (endosperm), during early to mid stage of fruit ripening                   |
| PZE-101014266/<br>PZA-000175002         | 1    | 8095694/<br>8553473                | GRMZM2G099454  | 7398292-7402945   | Chitinase (carbohydrate metabolic process) (chitin catabolic process)                                                           | Intermediate level in the seed, during early stage of fruit ripening (R1)                                                              |
|                                         |      |                                    | GRMZM2G009014  | 8510046-8514842   | Uncharacterized protein                                                                                                         | Intermediate level in the whole seed (embryo, endosperm (high level in R3), and pericarp), during early to mid stage of fruit ripening |
| SYN20196                                | 1    | 15512478                           | GRMZM2G026807  | 14623612-14638761 | Ribulose-phosphate 3-epimerase (carbohydrate metabolic process) (pentose-phosphate shunt)                                       | Intermediate to low level in the seed (endosperm), during early to mid stage of fruit ripening                                         |
| PUT-163a-16922676-1073                  | 1    | 46070067                           | GRMZM2G058138  | 46066290-46070815 | Uncharacterized protein                                                                                                         | Intermediate to high level in the whole seed, during early to mid stage of fruit ripening                                              |
|                                         |      |                                    | GRMZM5G824405  | 45641610-45669297 | Uncharacterized protein (carbohydrate metabolic process) (fructose metabolic process)                                           | High level in the whole seed, during early to mid stage of fruit ripening                                                              |
| PZE-101083826/<br>SYN38509/<br>SYN38510 | 1    | 72067065/<br>72105795/<br>72105859 | GRMZM2G179521  | 72102454-72121802 | Glucose-6-phosphate 1-dehydrogenase (carbohydrate metabolic process) (glucose metabolic process)                                | Very low level in the whole seed, during early to mid stage of fruit ripening                                                          |
|                                         |      |                                    | GRMZM2G074946  | 73254414-         | 6-phosphogluconolactonase (carbohydrate metabolic process)                                                                      | Intermediate to low level in the                                                                                                       |

|                                                             |   |                                       |               |                                     |                                                                                                    |                                                                                                                        |
|-------------------------------------------------------------|---|---------------------------------------|---------------|-------------------------------------|----------------------------------------------------------------------------------------------------|------------------------------------------------------------------------------------------------------------------------|
| PZE-101120556/<br>PZE-101120639/<br>PZE-101120645           | 1 | 148525047/<br>148566496/<br>148566793 | GRMZM2G703769 | 73259651<br>148584485-<br>148585067 | process) (oxidative pentose phosphate pathway)<br>Uncharacterized protein                          | seed (R1) and embryo (R4)<br>Intermediate to high level in the whole seed, during early to mid stage of fruit ripening |
| PZE-101131103/<br>PZE-101131114/<br>PZE-101131166<br>SYN422 | 1 | 168256682/<br>168257319/<br>168429768 | GRMZM2G018472 | 168430589-<br>168435266             | Uncharacterized protein (protein dimerization activity)                                            | Intermediate to high level in the whole seed, during early to mid stage of fruit ripening                              |
|                                                             | 1 | 236291257                             | GRMZM2G001606 | 236290320-<br>236292369             | Uncharacterized protein                                                                            | Intermediate to high level in the seed (endosperm), during early to mid stage of fruit ripening (R2 to R4)             |
| SYNGENTA11666/<br>PZE-102158721                             | 2 | 205583015/<br>206039441               | GRMZM2G408875 | 205410821-<br>205412632             | Phosphoenolpyruvate carboxykinase (ATP) (carbohydrate metabolic process) (gluconeogenesis)         | Intermediate to high level in the whole seed, during early to mid stage of fruit ripening                              |
|                                                             |   |                                       | GRMZM2G142932 | 205425915-<br>205430161             | Uncharacterized protein (protein dimerization activity)                                            | Intermediate to high level in the whole seed, during mid stage of fruit ripening                                       |
|                                                             |   |                                       | GRMZM2G166337 | 205695705-<br>205697501             | R2R3MYB-domain protein (regulation of raffinose metabolic process)                                 | Intermediate to high level in the whole seed, during early to mid stage of fruit ripening                              |
|                                                             |   |                                       | GRMZM2G367267 | 205316230-<br>205319784             | Cellulose synthase (UDP-forming) (carbohydrate metabolic process) (cellulose biosynthetic process) | Intermediate to low level in the whole seed, during early to mid stage of fruit ripening                               |
| PUT-163a-<br>148951348-515/<br>PZE-103010658                | 3 | 5789819/<br>5854416                   | GRMZM2G121452 | 6304666-<br>6313009                 | 26S proteasome non-ATPase regulatory subunit 8; uncharacterized protein (cotyledon development)    | Intermediate to high level in the whole seed, during early to mid stage of fruit ripening                              |
| SYN33444/<br>SYN33443                                       | 3 | 15137742/<br>15222626                 | GRMZM2G334628 | 15220879-<br>15230827               | Cell number regulator 8 (carbohydrate metabolic process) (glucose catabolic process)               | Intermediate to high level in the whole seed, during early to mid stage of fruit ripening                              |
|                                                             |   |                                       | GRMZM5G862219 | 15048628-<br>15056529               | Acyl-CoA dehydrogenase (lipid metabolic process) (fatty acid beta-oxidation)                       | Intermediate to high level in the embryo and pericarp, during early to mid stage of fruit ripening                     |
| PZE-103160210                                               | 3 | 211405876                             | GRMZM2G125044 | 211402713-<br>211410775             | Uncharacterized protein                                                                            | Intermediate to high level in the whole seed, during early to mid stage of fruit ripening                              |
|                                                             |   |                                       | GRMZM2G055585 | 211614266-<br>211618366             | Triacylglycerol lipase (carbohydrate metabolic process)                                            | Intermediate level in the seed, during early stage of fruit ripening                                                   |
| SYN33394/<br>PZE-103165953                                  | 3 | 215456783/<br>215462316               | GRMZM2G048049 | 215503227-<br>215505485             | Expressed protein                                                                                  | Intermediate to high level in the whole seed, during early to mid                                                      |

|                                 |   |                         |                            |                     |                                                                                                                                                                         |                                                                                                                      |
|---------------------------------|---|-------------------------|----------------------------|---------------------|-------------------------------------------------------------------------------------------------------------------------------------------------------------------------|----------------------------------------------------------------------------------------------------------------------|
|                                 |   |                         | GRMZM2G057942              | 215671743-215676285 | Uncharacterized protein (carbohydrate metabolic process) (glucuronoxylan/xylan metabolic process)                                                                       | stage of fruit ripening<br>Intermediate to high level in the whole seed, during early to mid stage of fruit ripening |
|                                 |   |                         | GRMZM2G037431              | 216010535-216013992 | Polygalacturonase (carbohydrate metabolic process) (homogalacturonan degradation)                                                                                       | High level in the embryo, during early to mid stage of fruit ripening                                                |
|                                 |   |                         | GRMZM2G429899 (shrunken-2) | 216495981-216505345 | Glucose-1-phosphate adenylyltransferase large subunit 1, chloroplastic/amyloplastic (carbohydrate metabolic process) (starch biosynthetic process)                      | High level in the endosperm during early to mid stage of fruit ripening                                              |
| PZE-104008299                   | 4 | 5595386                 | GRMZM2G059620              | 5548772-5561370     | Zein-alpha 19B1 (nutrient reservoir activity)                                                                                                                           | High level in the seed (endosperm), during mid stage of fruit ripening                                               |
|                                 |   |                         | GRMZM2G053120              | 5544525-5545663     | Zein-alpha PMS1 (nutrient reservoir activity)                                                                                                                           | High level in the seed (endosperm), during mid stage of fruit ripening                                               |
|                                 |   |                         | GRMZM2G353272              | 5539880-5541152     | Zein-alpha PMS1 (nutrient reservoir activity)                                                                                                                           | High level in the seed (endosperm), during mid stage of fruit ripening                                               |
|                                 |   |                         | GRMZM2G353268              | 5535743-5536690     | Zein-alpha A30 (nutrient reservoir activity)                                                                                                                            | High level in the seed (endosperm), during mid stage of fruit ripening                                               |
|                                 |   |                         | GRMZM2G404459              | 5521259-5523302     | Zein-alpha Z4 (nutrient reservoir activity)                                                                                                                             | High level in the seed (endosperm), during mid stage of fruit ripening                                               |
| PZE-104033791/<br>PZE-104033817 | 4 | 42284265/<br>42288134   | GRMZM2G138060              | 41396390-41405179   | Sugary1 (carbohydrate metabolic process) (maltose metabolic process) (starch biosynthetic process)                                                                      | High level in the seed (endosperm), during early to mid stage of fruit ripening                                      |
| PZE-104080384                   | 4 | 154716758               | GRMZM2G004131              | 154074091-154075878 | Farnesyltransferase (lipid metabolic process) (isoprenoid biosynthetic process)                                                                                         | Intermediate level in the whole seed, during early to mid stage of fruit ripening                                    |
| SYN526                          | 5 | 4254700                 | GRMZM2G007063              | 4253958-4257719     | opaque2 heterodimerizing protein2                                                                                                                                       | Intermediate to high level in the whole seed, during early to mid stage of fruit ripening                            |
|                                 |   |                         | GRMZM2G099630              | 4351432-4366692     | Uncharacterized protein (carbohydrate metabolic process) (protein glycosylation/N-linked glycosylation) (glucuronoxylan metabolic process) (xylan biosynthetic process) | High level in the whole seed, during early to mid stage of fruit ripening                                            |
| SYN4651/SYN4646                 | 6 | 147905068/<br>147909387 | GRMZM2G070075              | 147904224-147915023 | Uncharacterized protein                                                                                                                                                 | Intermediate level in the whole seed, during early to mid stage of fruit ripening                                    |

|                                                   |   |                                       |               |                     |                                                                                                                                                                                                                  |                                                                                                      |
|---------------------------------------------------|---|---------------------------------------|---------------|---------------------|------------------------------------------------------------------------------------------------------------------------------------------------------------------------------------------------------------------|------------------------------------------------------------------------------------------------------|
|                                                   |   |                                       | GRMZM2G058472 | 148164946-148170153 | Secondary cell wall glycosyltransferase family 8 isoform 1; Secondary cell wall glycosyltransferase family 8 isoform 2; Uncharacterized protein (starch metabolic process) (glucuronoxylan biosynthetic process) | Intermediate level in the pericarp, during mid stage of fruit ripening (R3)                          |
|                                                   |   |                                       | GRMZM2G121514 | 147413665-147418505 | Beta-N-acetylhexosaminidase (carbohydrate metabolic process)                                                                                                                                                     | Intermediate to high level in the embryo, during mid stage of fruit ripening                         |
| PZE-106100720                                     | 6 | 153502756                             | GRMZM2G389089 | 152682292-152683790 | Protein-synthesizing GTPase (lipid metabolic process)                                                                                                                                                            | Intermediate to high level in the whole seed, during early to mid stage of fruit ripening            |
| PZE-106115889/<br>PZE-106116148/<br>PZE-106116156 | 6 | 161854167/<br>161924948/<br>161990361 | GRMZM2G164676 | 161750718-161815082 | Beta-galactosidase (carbohydrate metabolic process) (glucuronoxylan metabolic process) (xylan biosynthetic process)                                                                                              | Intermediate level in the seed, during early stage of fruit ripening (R1)                            |
| SYN12692/<br>PZA02688.2/<br>SYN12698              | 6 | 164180276/<br>164183687/<br>164186726 | GRMZM2G085483 | 164074969-164076264 | Uncharacterized protein (carbohydrate metabolic process) (pentose-phosphate shunt)                                                                                                                               | High level in the embryo and endosperm, during early stage of fruit ripening                         |
|                                                   |   |                                       | GRMZM2G085641 | 164063630-164068010 | Uncharacterized protein (lipid metabolic process)                                                                                                                                                                | Intermediate level in the embryo, during mid stage of fruit ripening (R4)                            |
| PZE-107083429                                     | 7 | 125723685                             | GRMZM2G133613 | 124733971-124736951 | N-acetyllactosaminide 3-alpha-galactosyltransferase (carbohydrate metabolic process) (protein glycosylation)                                                                                                     | Intermediate to low level in the endosperm, during mid stage of fruit ripening                       |
| PZE-107105783/<br>SYN36108                        | 7 | 157912189/<br>157914433               | GRMZM2G000453 | 157913771-157914605 | Expressed protein (lipid metabolic process)                                                                                                                                                                      | Intermediate level in the seed, during early stage of fruit ripening (R1)                            |
|                                                   |   |                                       | GRMZM2G008309 | 157718341-157719866 | Fiber expressed protein                                                                                                                                                                                          | High level in the embryo, during early to mid stage of fruit ripening                                |
|                                                   |   |                                       | GRMZM2G060579 | 158336653-158342207 | Uncharacterized protein (carbohydrate metabolic process) (pectin biosynthetic process)                                                                                                                           | Intermediate level in the whole seed, during early to mid stage of fruit ripening                    |
| PZE-107105855                                     | 7 | 157934803                             | GRMZM2G000453 | 157913771-157914605 | Expressed protein (lipid metabolic process)                                                                                                                                                                      | Intermediate to low level in the whole, during early to mid stage of fruit ripening                  |
| PZE-108004908                                     | 8 | 5025189                               | GRMZM2G017555 | 5330395-5332835     | Pectinesterase (pectin catabolic process) (carbohydrate metabolic process)                                                                                                                                       | Intermediate level in the whole seed, during early to mid stage of fruit ripening                    |
|                                                   |   |                                       | GRMZM2G416836 | 5488159-5500321     | Putative trehalose phosphatase/synthase family protein (carbohydrate metabolic process) (trehalose biosynthetic process)                                                                                         | Intermediate level in the seed (endosperm and pericarp), during early to mid stage of fruit ripening |
|                                                   |   |                                       | GRMZM2G029731 | 4616570-            | Inositol-1-monophosphatase (carbohydrate metabolic process)                                                                                                                                                      | Intermediate to high level in the                                                                    |

|                                                   |    |                                       |               |                         |                                                                                                                                                              |                                                                                                                            |
|---------------------------------------------------|----|---------------------------------------|---------------|-------------------------|--------------------------------------------------------------------------------------------------------------------------------------------------------------|----------------------------------------------------------------------------------------------------------------------------|
|                                                   |    |                                       |               | 4620398                 | process) (inositol biosynthetic process)                                                                                                                     | whole seed, during early to mid stage of fruit ripening                                                                    |
| PZE-108052599/<br>PZE-108052600/<br>PZE-108052603 | 8  | 92730672/<br>92730702/<br>92732462    | GRMZM2G022768 | 91588208-<br>91592778   | N-acetyllactosaminide 3-alpha-galactosyltransferase (carbohydrate metabolic process) (protein glycosylation)                                                 | High level in the seed (endosperm), during early stage of fruit ripening                                                   |
| PZE-108134983/<br>SYN20808/<br>PZE-108135203      | 8  | 173931575/<br>173953651/<br>174257043 | GRMZM2G087117 | 173953988-<br>173958520 | Uncharacterized protein                                                                                                                                      | Intermediate to high level in the whole seed, during early to mid stage of fruit ripening                                  |
|                                                   |    |                                       | GRMZM2G002786 | 174954713-<br>174956656 | Seed maturation protein; uncharacterized protein                                                                                                             | High level in the seed, during early stage of fruit ripening (R1); high level in the pericarp, during fruit formation (R3) |
|                                                   |    |                                       | GRMZM2G118462 | 173973120-<br>173978270 | Trehalose phosphatase/synthase family protein; uncharacterized protein (carbohydrate metabolic process)                                                      | Intermediate level in the whole seed, during early to mid stage of fruit ripening                                          |
|                                                   |    |                                       | GRMZM2G149093 | 173845613-<br>173848278 | Uncharacterized protein (lipid metabolic process) (triglyceride lipase activity) (hydrolase activity)                                                        | Intermediate to high level in the embryo, during early to mid stage of fruit ripening                                      |
| SYN17231/<br>PZE-110006423                        | 10 | 4990421/<br>4993061                   | GRMZM2G004534 | 4697235-<br>4702142     | Pyruvate kinase (carbohydrate metabolic process) (glycolytic process)                                                                                        | Intermediate level in the seed (embryo and pericarp), during early stage of fruit ripening                                 |
|                                                   |    |                                       | GRMZM2G003732 | 4641206-<br>4667439     | Uncharacterized protein (embryo development)                                                                                                                 | Intermediate to high level in the whole seed, during early to mid stage of fruit ripening                                  |
| PZE-110007091/<br>PZE-110007194/<br>SYN16757      | 10 | 5485252/<br>5537112/<br>5592617       | GRMZM2G051637 | 5591911-<br>5595821     | Putative receptor protein kinase CRINKLY4 (lipid storage) (cotyledon development)                                                                            | Intermediate to high level in the whole seed, during early to mid stage of fruit ripening                                  |
| PZE-110012640/<br>PZE-110012671                   | 10 | 11088851/<br>11184622                 | GRMZM2G392513 | 11408729-<br>11421794   | Inositol-3-phosphate synthase (carbohydrate metabolic process) (inositol biosynthetic process) (lipid metabolic process) (phospholipid biosynthetic process) | High level in the embryo, during early to mid stage of fruit ripening                                                      |
| PZE-110045755/<br>SYN37480                        | 10 | 86439624/<br>86528026                 | GRMZM2G004131 | 87096816-<br>87098996   | Farnesyltransferase (lipid metabolic process) (triglyceride biosynthetic process)                                                                            | Intermediate to low level in the whole seed, during early to mid stage of fruit ripening                                   |
|                                                   |    |                                       | GRMZM2G123029 | 87103468-<br>87106603   | Pepsin A (lipid metabolic process)                                                                                                                           | Intermediate level in the seed, during early to mid stage of fruit ripening                                                |
| SYN16982/<br>SYN16979/<br>PZE-110060686           | 10 | 114875299/<br>114876217/<br>114892724 | GRMZM2G049681 | 114873031-<br>114876662 | Putative uncharacterized protein (protein metabolic process)                                                                                                 | High level in the embryo, during early stage of fruit ripening                                                             |
